# Supplementary material
Source: PubMed Central journal article supplement (PMC5617103)
Supplement: NIHMS73446-supplement-Supplementary_Figure_8.pdf [file NIHMS73446-supplement-Supplementary_Figure_8.pdf]

Figure 1b

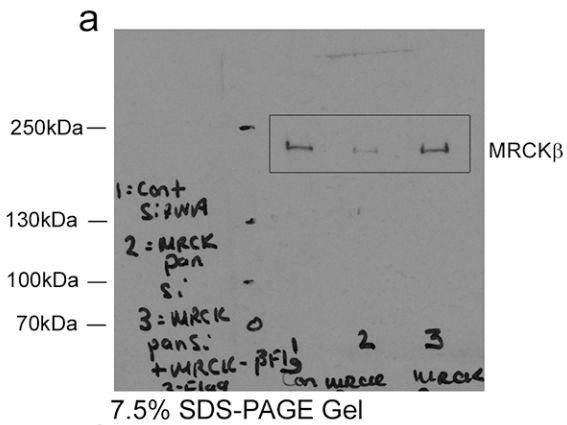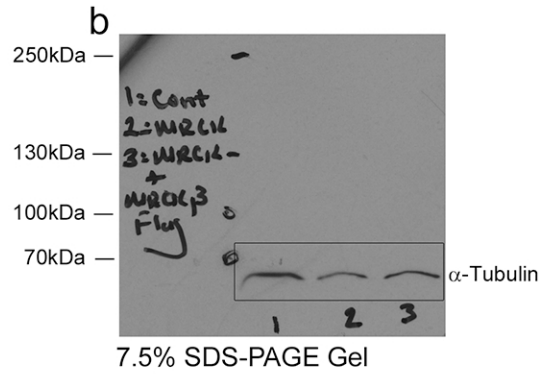

Figure 3e

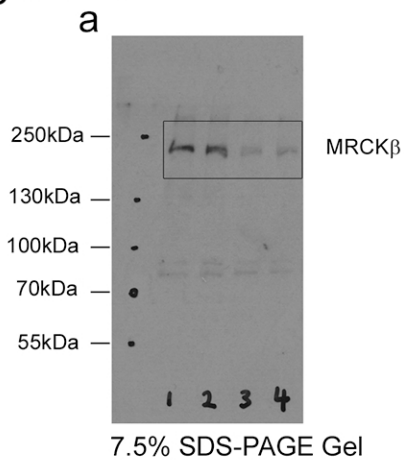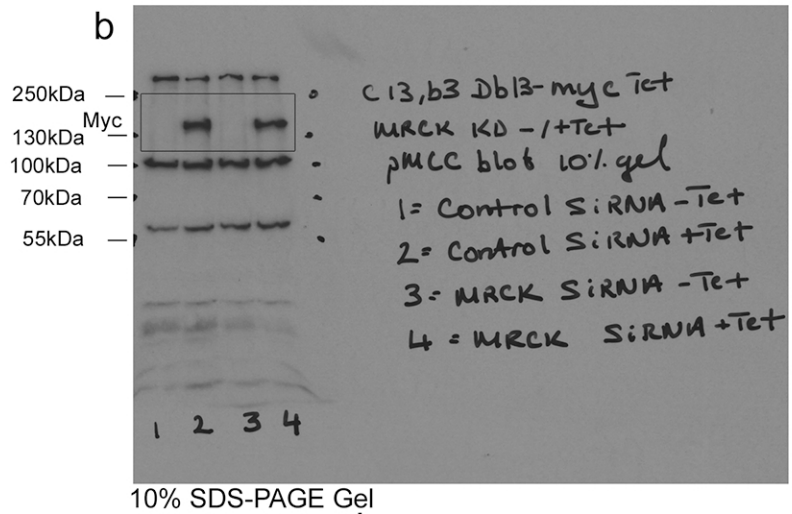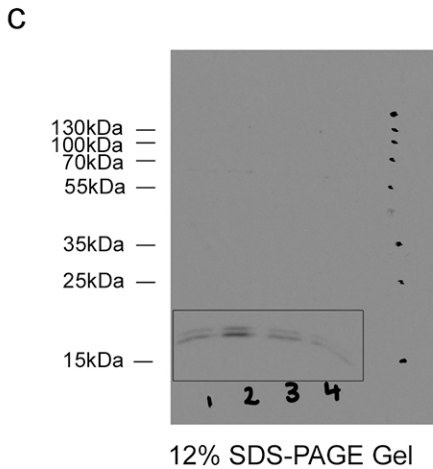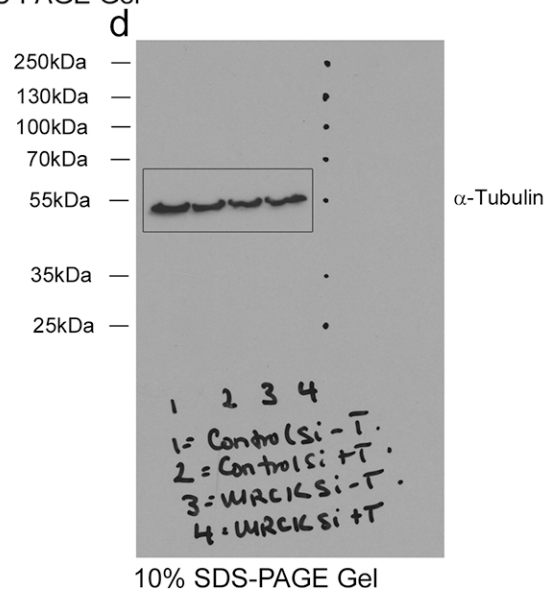



# Figure 7c Cont'd

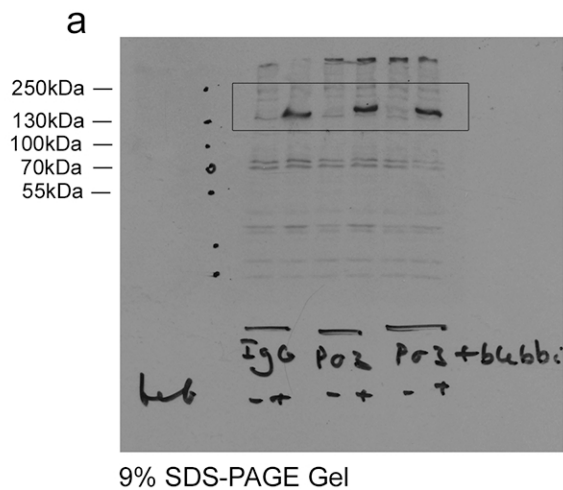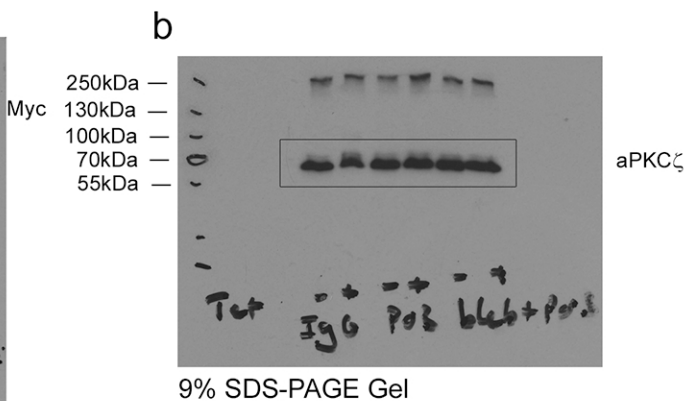

# Supplementary Figure 3e

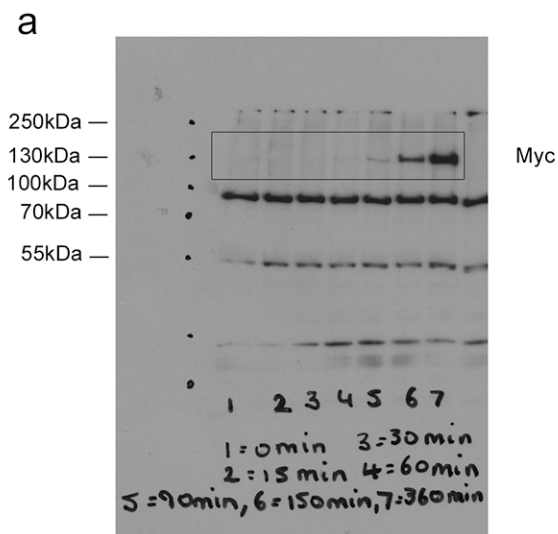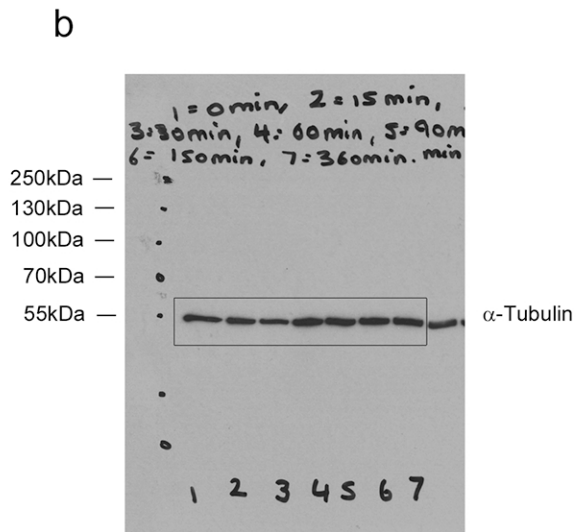

# Supplementary Figure 4b

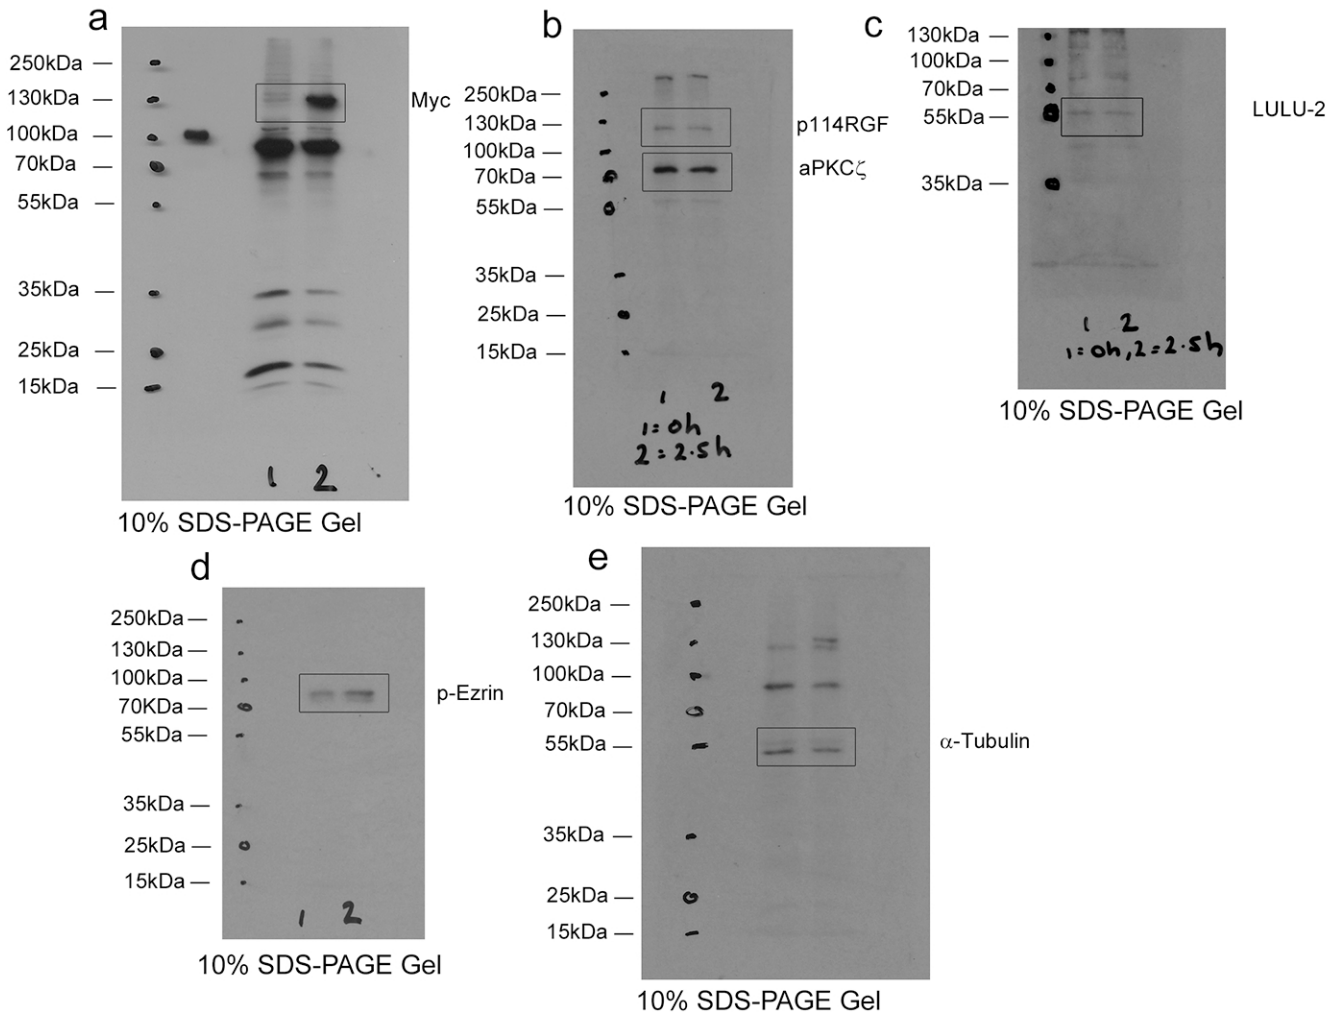

# Supplementary Figure 5b

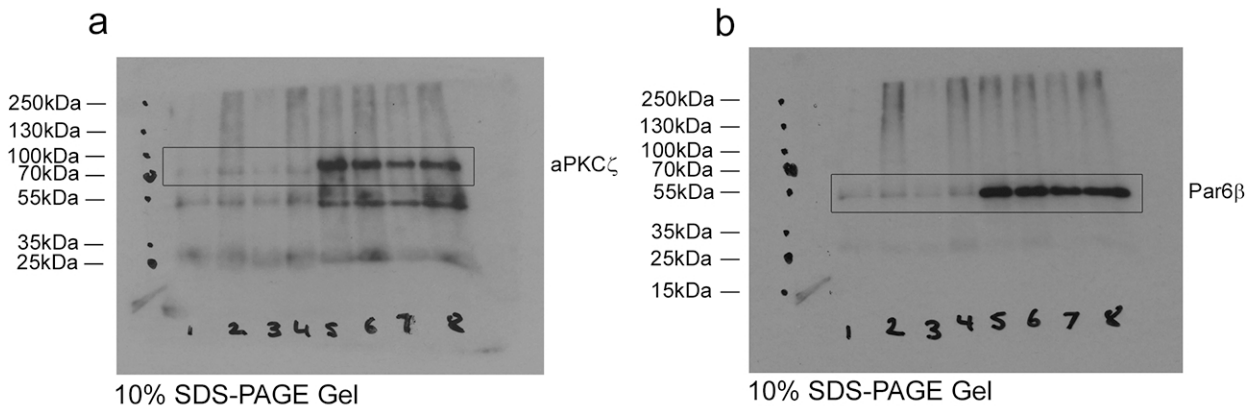

# Supplementary Figure 5b Cnt'd

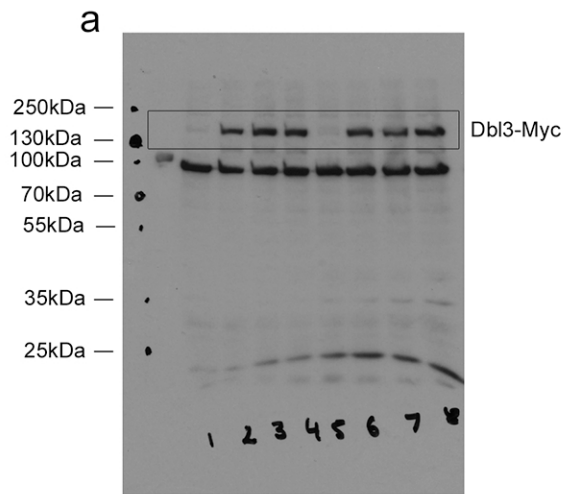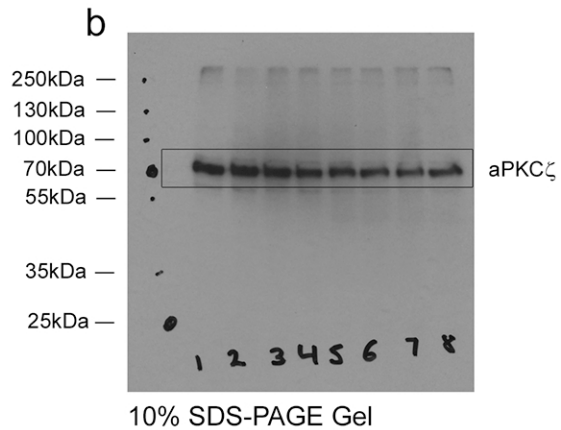

**c** 10% SDS-PAGE Gel

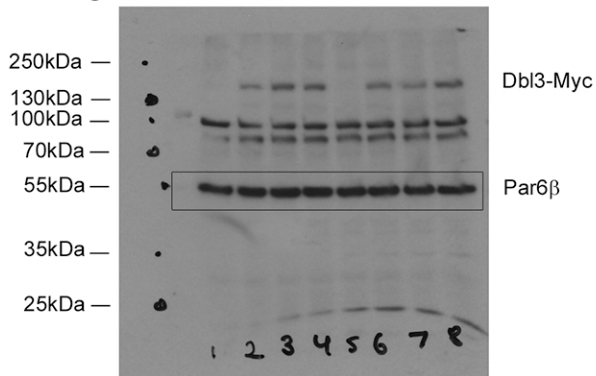

10% SDS-PAGE Gel

**a** Supplementary Figure 6e

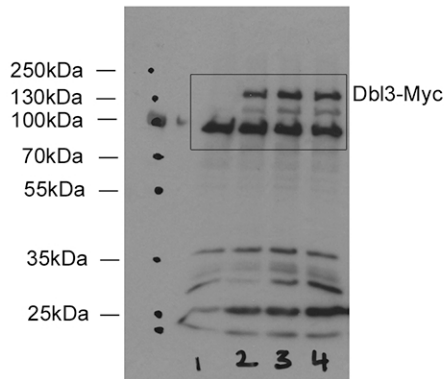

10% SDS-PAGE Gel

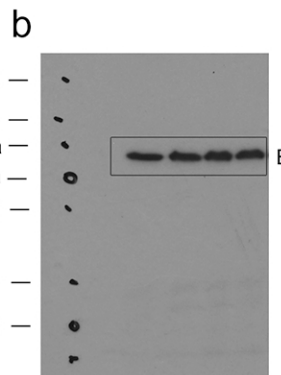

10% SDS-PAGE Gel

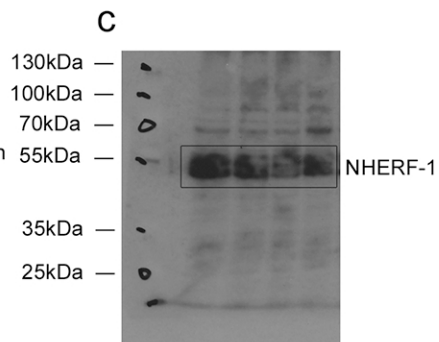

10% SDS-PAGE Gel

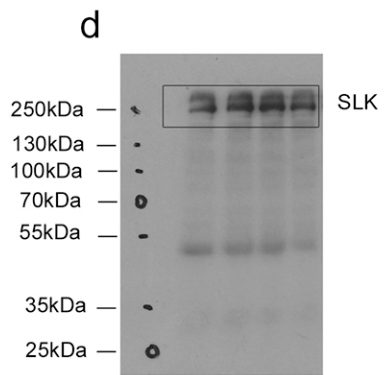

10% SDS-PAGE Gel
